# Supplementary material for: Optimizing the Conditions for Whole-Genome Sequencing of Avian Reoviruses
Source: MDPI journal article supplement (doi:10.3390/v15091938), 2023-09-16
Supplement: s1 [file s1]

**Table S1.** ARV isolates used in this study.

| ID         | Host    | Pathology                                                               | Collection year | Location | NCBI Biosample no. |
|------------|---------|-------------------------------------------------------------------------|-----------------|----------|--------------------|
| Alabama    | Chicken | Mild lymphocytic myocarditis and moderate hepatic sinusoidal congestion | 2021            | AL:USA   | SAMN36407456       |
| ARV_94594  | Chicken | Tenosynovitis                                                           | 2012            | AL:USA   | SAMN36407457       |
| ARV_126484 | Chicken | Tenosynovitis                                                           | 2018            | IA:USA   | SAMN36407458       |
| ARV_99846  | Chicken | Tenosynovitis                                                           | 2013            | NC:USA   | SAMN36407459       |
| ARV_106764 | Chicken | Tenosynovitis                                                           | 2014            | IA:USA   | SAMN36407460       |
| ARV141045  | Chicken | Tenosynovitis                                                           | 2021            | AL:USA   | SAMN36407461       |
| S1133      | Vaccine | -                                                                       |                 |          | SAMN36407462       |

**Table S2.** Raw reads obtained per sample on each sequencing run.

A) Sequencing runs 1 and 2

| Virion Purification Method | Benzonase Treatment | Host rRNA Depletion | R-SPA | #Exp1 ARV_Alabama | #Exp2 ARV_94594 | #Exp2 ARV_126484 |
|----------------------------|---------------------|---------------------|-------|-------------------|-----------------|------------------|
| CaptoCore700               | -                   | -                   | -     | 76,080            | -               | -                |
| CaptoCore700               | Benzonase           | -                   | -     | 253,978           | -               | -                |
| CaptoCore700               | -                   | Depletion           | -     | 64,268            | -               | -                |
| CaptoCore700               | Benzonase           | Depletion           | -     | 18,412            | -               | -                |
| CaptoCore700               | -                   | -                   | R-SPA | 45,206            | 28,624          | 8,388            |
| CaptoCore700               | Benzonase           | -                   | R-SPA | 37,816            | 60,256          | -                |
| CaptoCore700               | -                   | Depletion           | R-SPA | 34,178            | 33,338          | 16,700           |
| CaptoCore700               | Benzonase           | Depletion           | R-SPA | 27,498            | 27,912          | 14,954           |
| sSucrose Gradient          | -                   | -                   | -     | 17,460            | -               | -                |
| Sucrose Gradient           | Benzonase           | -                   | -     | 20,274            | -               | -                |
| Sucrose Gradient           | -                   | Depletion           | -     | 5,110             | -               | -                |
| Sucrose Gradient           | Benzonase           | Depletion           | -     | 6,920             | -               | -                |
| Sucrose Gradient           | -                   | -                   | R-SPA | 98,618            | 50,016          | 23,972           |
| Sucrose Gradient           | Benzonase           | -                   | R-SPA | 79,140            | 17,332          | 105,092          |
| Sucrose Gradient           | -                   | Depletion           | R-SPA | 194,348           | 13,882          | 118,070          |
| Sucrose Gradient           | Benzonase           | Depletion           | R-SPA | 87,704            | 6,918           | 16,300           |

B) Sequencing run 3

| Virion Purification Method | Host rRNA Depletion | R-SPA | Raw reads ARV_99846 | Raw reads ARV_106764 | Raw reads ARV_141045 | Raw reads S1133 |
|----------------------------|---------------------|-------|---------------------|----------------------|----------------------|-----------------|
| -                          | -                   | R-SPA | 30,674              | 7,018                | 15,550               | 8,870           |
| CaptoCore700               | -                   | R-SPA | 22,520              | 22,756               | 61,896               | 11,062          |
| -                          | Depletion           | R-SPA | 16,762              | 14,830               | 22,702               | 25,746          |
| CaptoCore700               | Depletion           | R-SPA | 18,180              | 58,940               | 16,734               | 11,684          |

**Table S3.** Summary of the WGS data generated from ARV isolates ARV\_Alabama in sequencing run 1 and, ARV\_94594 and ARV\_126484 in sequencing run 2.

| Virus ID    | Virion Purification Method | Benzonase Treatment | Host rRNA Depletion | R-SPA | Filtered reads | %Chicken-mapping Filtered Reads | %ARV-mapping Filtered Reads | Total Contigs | ARV Contigs | Estimated Genome Coverage | Estimated Genome Length (bp) |
|-------------|----------------------------|---------------------|---------------------|-------|----------------|---------------------------------|-----------------------------|---------------|-------------|---------------------------|------------------------------|
| ARV_94594   | s                          | -                   | -                   | R-SPA | 24,518         | 98                              | 2                           | 15            | 14          | 8                         | 15,510                       |
|             | CaptoCore700               | Benzonase           | -                   | R-SPA | 52,093         | 77                              | 25                          | 25            | 11          | 169                       | 18,754                       |
|             | CaptoCore700               | -                   | Depletion           | R-SPA | 21,951         | 2                               | 75                          | 14            | 12          | 204                       | 23,251                       |
|             | CaptoCore700               | Benzonase           | Depletion           | R-SPA | 21,349         | 0                               | 73                          | 9             | 9           | 217                       | 23,134                       |
|             | Sucrose gradient           | -                   | -                   | R-SPA | 40,499         | 33                              | 58                          | 16            | 14          | 307                       | 22,234                       |
|             | Sucrose gradient           | Benzonase           | -                   | R-SPA | 11,788         | 2                               | 71                          | 18            | 17          | 94                        | 23,236                       |
|             | Sucrose gradient           | -                   | Depletion           | R-SPA | 5,972          | 43                              | 50                          | 32            | 15          | 36                        | 20,427                       |
|             | Sucrose gradient           | Benzonase           | Depletion           | R-SPA | 4,683          | 48                              | 47                          | 16            | 11          | 28                        | 19,988                       |
| ARV_126484  | CaptoCore700               | -                   | -                   | R-SPA | 6,343          | 98                              | 2                           | -             | -           | -                         | -                            |
|             | CaptoCore700               | Benzonase           | -                   | R-SPA | -              | -                               | -                           | -             | -           | -                         | -                            |
|             | CaptoCore700               | -                   | Depletion           | R-SPA | 13,247         | 0                               | 81                          | 10            | 10          | 115                       | 23,241                       |
|             | CaptoCore700               | Benzonase           | Depletion           | R-SPA | 11,014         | 0                               | 77                          | 15            | 15          | 92                        | 23,038                       |
|             | Sucrose gradient           | -                   | -                   | R-SPA | 14,022         | 57                              | 50                          | 11            | 11          | 79                        | 22,845                       |
|             | Sucrose gradient           | Benzonase           | -                   | R-SPA | 91,542         | 94                              | 11                          | 128           | 60          | 64                        | 21,385                       |
|             | Sucrose gradient           | -                   | Depletion           | R-SPA | 112,316        | 0                               | 60                          | 26            | 16          | 541                       | 18,752                       |
|             | Sucrose gradient           | Benzonase           | Depletion           | R-SPA | 12,088         | 0                               | 78                          | 16            | 16          | 98                        | 23,172                       |
| ARV_Alabama | CaptoCore700               | -                   | -                   | R-SPA | 30,665         | 98                              | 0.1                         | 0             | 0           | 0                         | 0                            |
|             | CaptoCore700               | Benzonase           | -                   | R-SPA | 22,516         | 33                              | 51                          | 12            | 10          | 157                       | 21,566                       |
|             | CaptoCore700               | -                   | Depletion           | R-SPA | 12,482         | 32                              | 57                          | 14            | 11          | 87                        | 22,381                       |
|             | CaptoCore700               | Benzonase           | Depletion           | R-SPA | 17,978         | 31                              | 59                          | 20            | 14          | 130                       | 23,638                       |
|             | Sucrose gradient           | -                   | -                   | R-SPA | 81,379         | 76                              | 23                          | 24            | 17          | 671                       | 12,081                       |
|             | Sucrose gradient           | Benzonase           | -                   | R-SPA | 35,942         | 22                              | 77                          | 13            | 12          | 316                       | 22,011                       |
|             | Sucrose gradient           | -                   | Depletion           | R-SPA | 150,048        | 84                              | 16                          | 15            | 13          | 435                       | 15,486                       |
|             | Sucrose gradient           | Benzonase           | Depletion           | R-SPA | 71,016         | 66                              | 34                          | 19            | 13          | 300                       | 18,042                       |

**Table S4.** ARV read enrichment (A) and cost associated (B) with the implementation of each strategy A)

|                                    | No<br>Purification/<br>Enrichment | R-SPA   | Capto.<br>R-SPA | Depl.<br>R-SPA | Capto.<br>Depl.<br>R-SPA | Ideal<br>Conditions |
|------------------------------------|-----------------------------------|---------|-----------------|----------------|--------------------------|---------------------|
| Proportion of ARV reads in library | 0.1%                              | 17%     | 24%             | 52%            | 77%                      | 100%                |
| Reads for X200 genome coverage     | 2,820,000                         | 165,882 | 117,500         | 54,231         | 36,623                   | 28,200              |
| Libraries per cartridge            | 1                                 | 12      | 17              | 37             | 55                       | 71                  |

B)

|                            | No<br>Purification/<br>Enrichment | R-SPA | Capto.<br>R-SPA | Depl.<br>R-SPA | Capto.<br>Depl.<br>R-SPA |
|----------------------------|-----------------------------------|-------|-----------------|----------------|--------------------------|
| Capto Core 700             | -                                 | -     | 3               | -              | 3                        |
| RNA extraction             | 7                                 | 7     | 7               | 7              | 7                        |
| Host-rRNA depletion        | -                                 | -     | -               | 18             | 18                       |
| R-SPA                      | -                                 | 25    | 25              | 25             | 25                       |
| Gnomic library prep        | 45                                | 45    | 45              | 45             | 45                       |
| Cartridge price per sample | 400                               | 33    | 24              | 11             | 7                        |
| Price per genome           | 452                               | 110   | 104             | 106            | 106                      |
